# Supplementary material
Source: PubMed Central journal article supplement (PMC4259184)
Supplement: Supp_Table1.pdf [file Supp_Table1.pdf]

## Supplementary Data

SUPPLEMENTARY TABLE S1. GENE SYMBOLS  
AND TAQMAN<sup>®</sup> GENE EXPRESSION ASSAY ID  
FOR ASSESSMENT OF VARIABILITY OF ENDOGENOUS  
CONTROL GENES TESTED IN DIFFERENT TISSUES  
AND NONINFECTED AND INFECTED CHICKENS

---

| <i>Gene symbol</i> | <i>TaqMan<sup>®</sup> gene<br/>expression assay ID</i> |
|--------------------|--------------------------------------------------------|
| TBP                | Gg03366485_m1                                          |
| GAPDH              | Gg03346982_m1                                          |
| HPRT1              | Gg03338895_m1                                          |
| YWHAE              | Gg03368460_m1                                          |
| RPL4               | Gg03370194_g1                                          |
| GUSB               | Gg03358467_m1                                          |

---

For all assays, the dye FAM\_MGB was chosen.
